# Supplementary material
Source: PubMed Central journal article supplement (PMC7813478)
Supplement: mmc1.pdf [file mmc1.pdf]

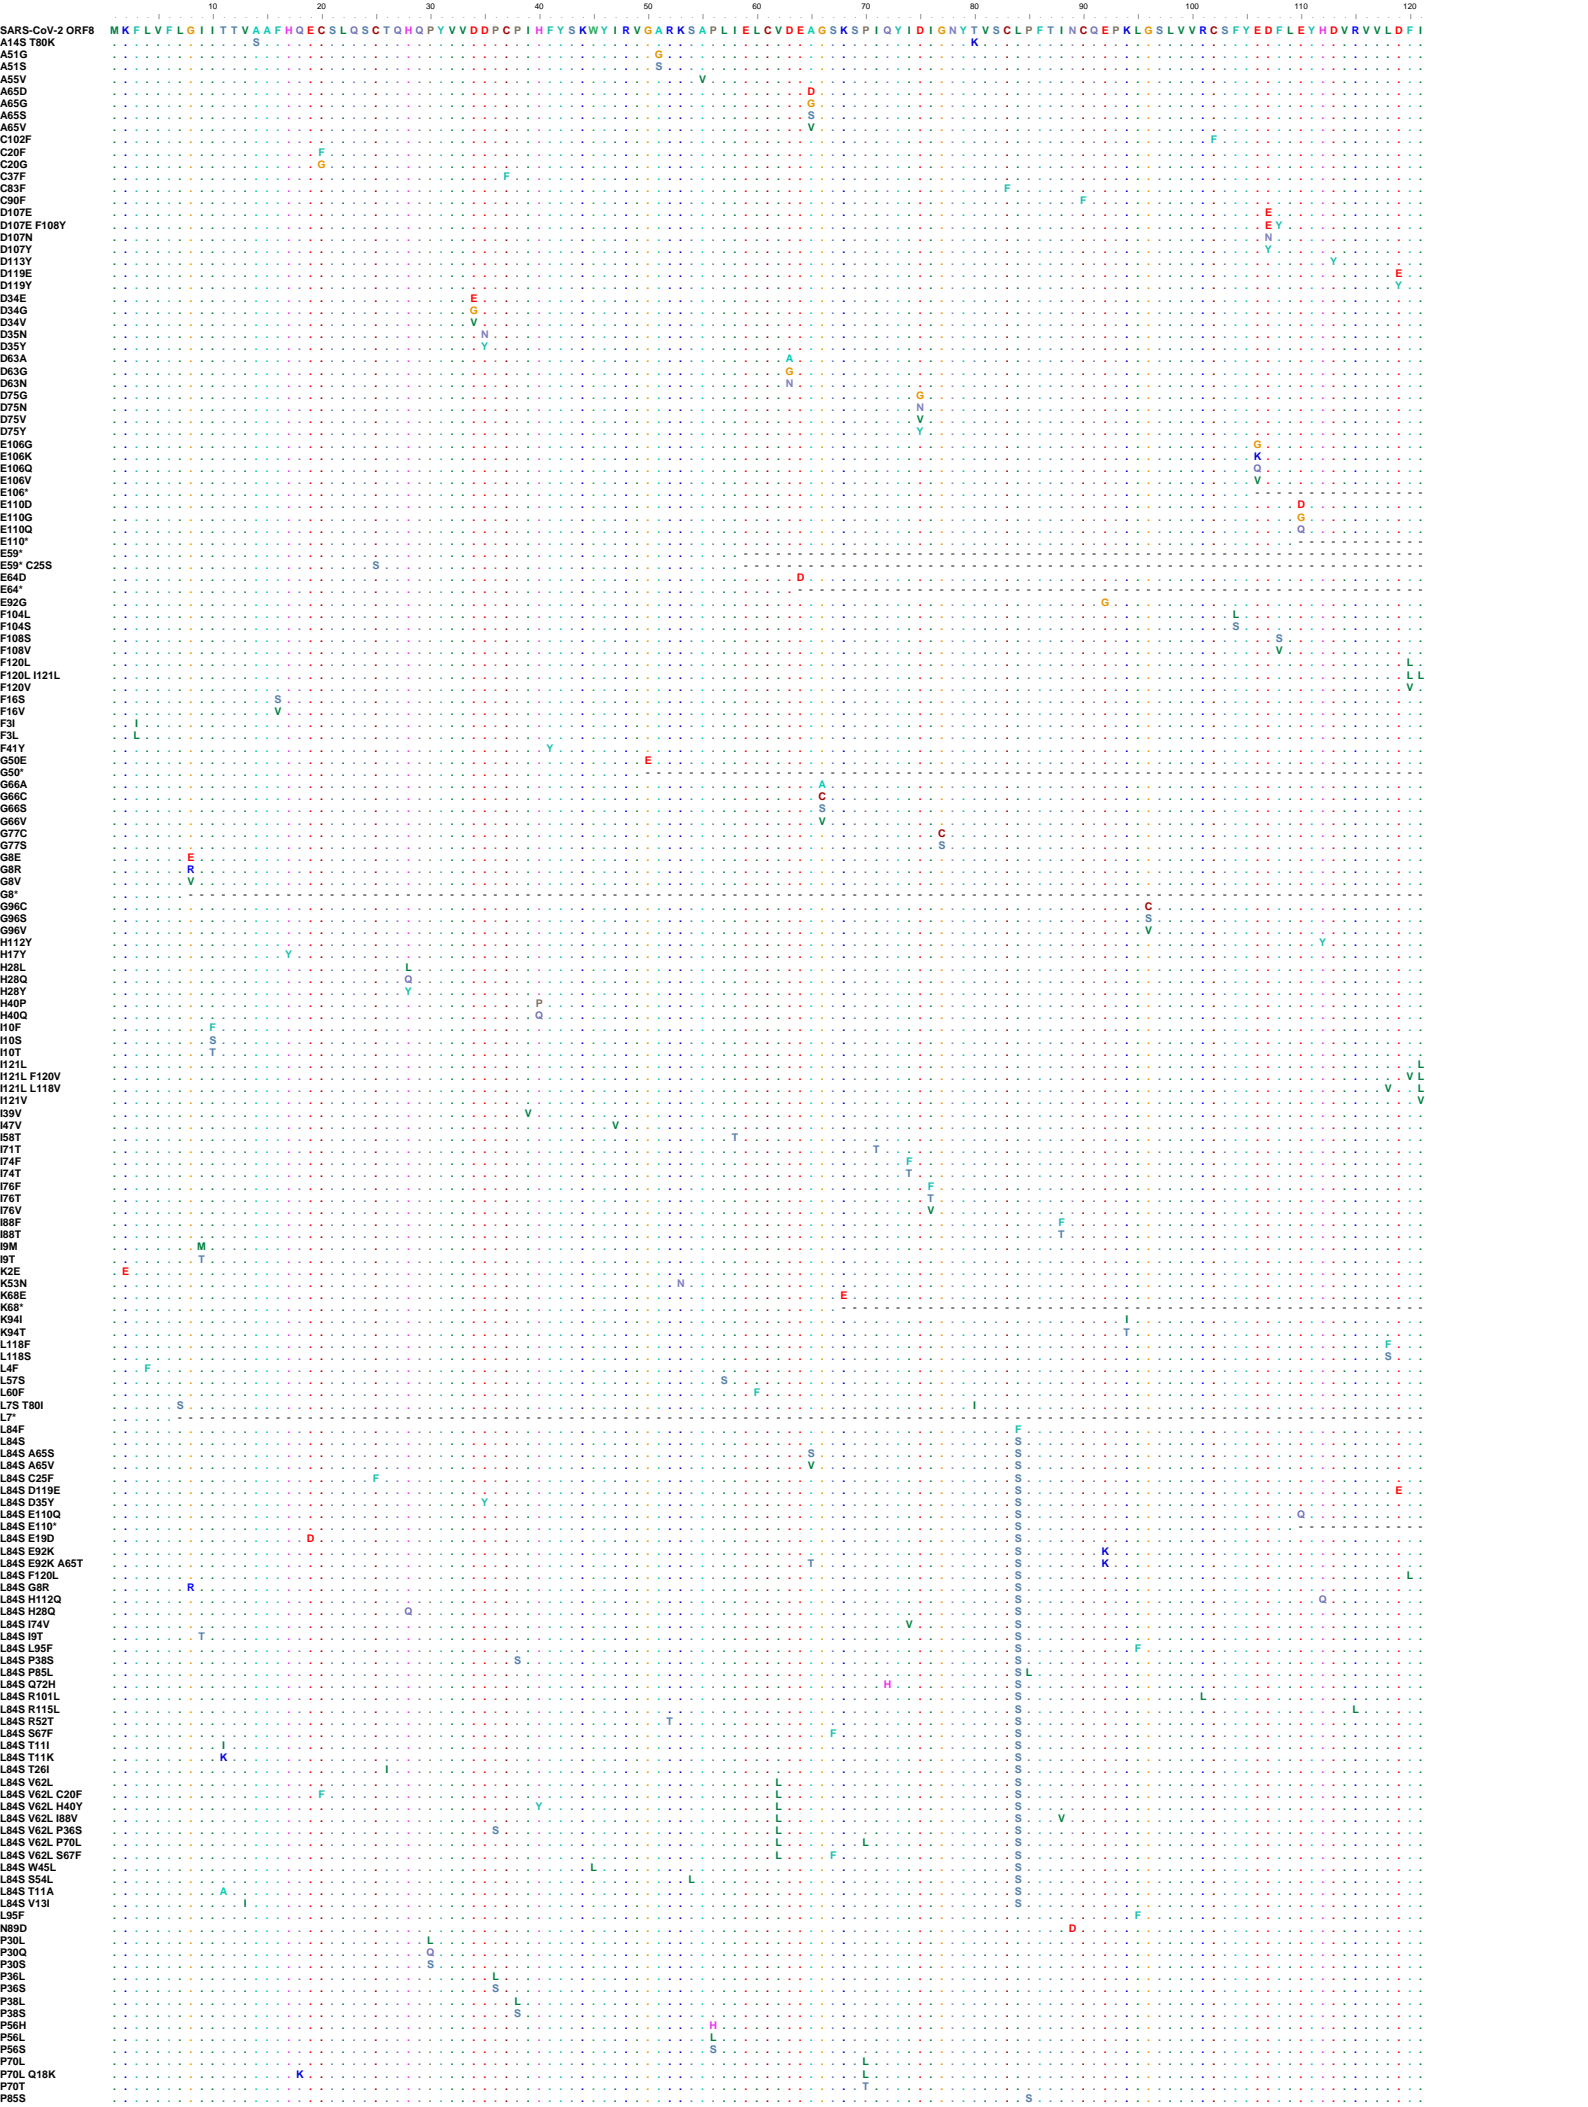

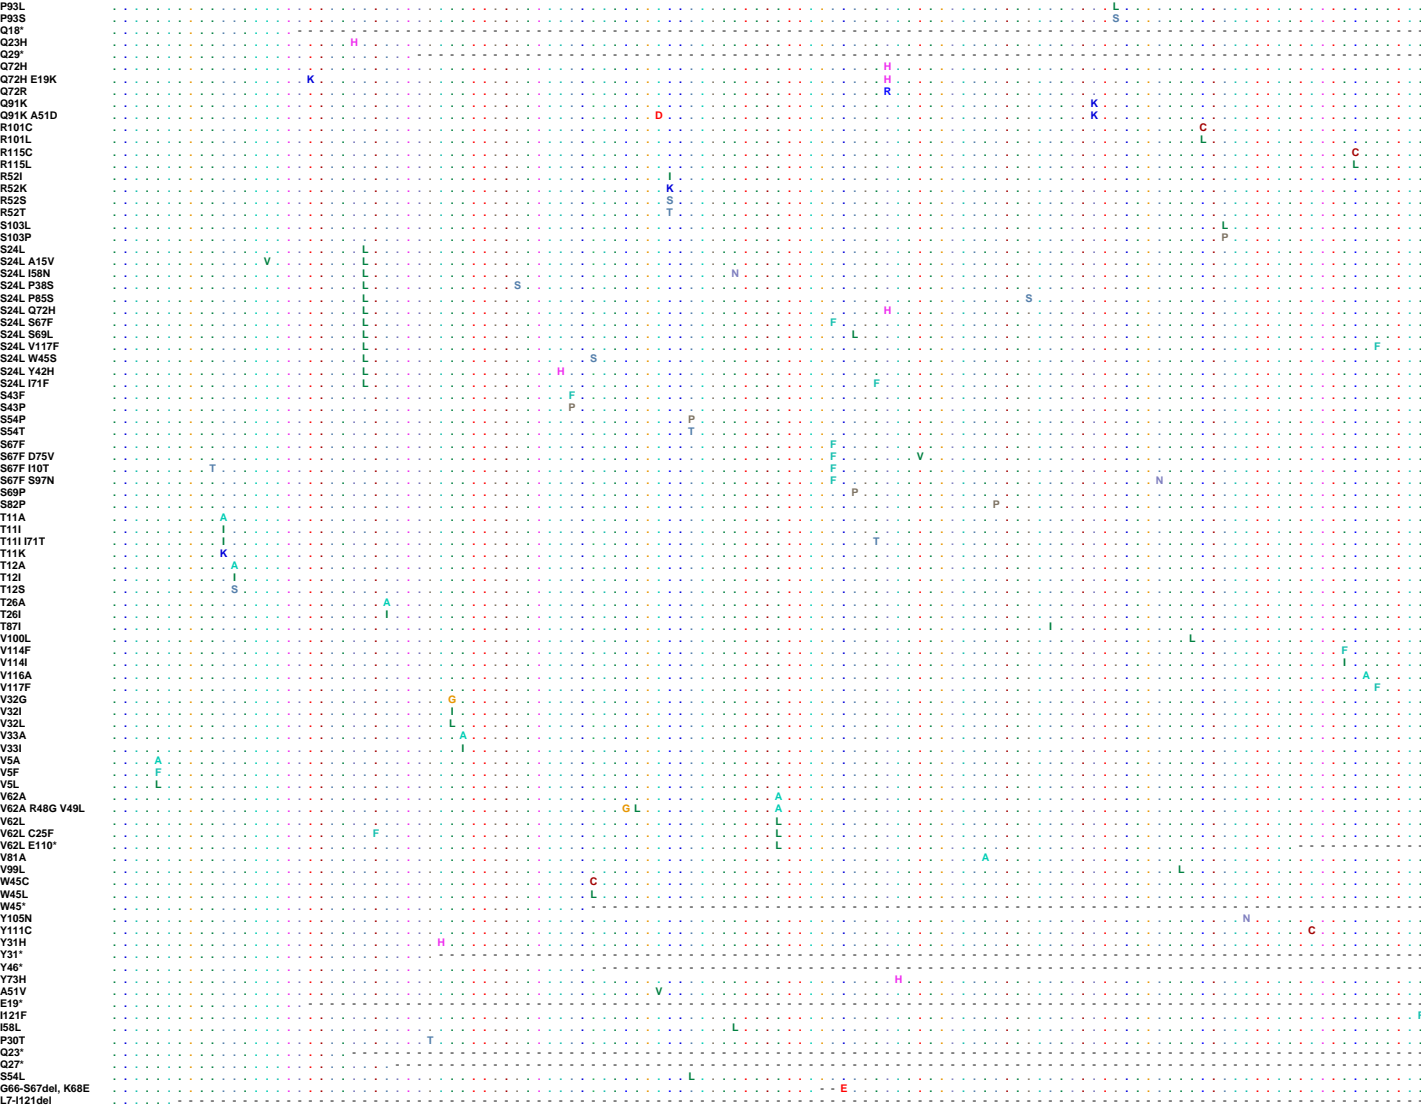

**Figure S1: ORF8 variants' sequence alignments.**

ORF8 Protein sequence alignments of Human SARS-CoV-2 (YP\_009724396.1) and ORF8 variants are shown. The sequences are the same as those that are used for phylogenetic trees, in addition to L7-I121del. Identical sequences are indicated as dots, whilst deletions and truncated sequences are shown as dashes.
